# Supplementary material for: Automatic and multi-channel detection of bacteria on a slidable centrifugal disc based on FTA card nucleic acid extraction and recombinase aided amplification
Source: Royal Society of Chemistry journal article supplement (doi:10.1039/d1lc00915j), 2021-11-11
Supplement: d1lc00915j1.pdf [file d1lc00915j1.pdf]

**Automatic and multi-  
channel detection of bacteria on a slidable centrifugal  
disc based on FTA card nucleic acid extraction and re  
combinase aided amplification**

Siyuan Wang<sup>1,2</sup>, Gaozhe Cai<sup>3</sup>, Hong Duan<sup>1</sup>, Wuzhen Qi<sup>2</sup>, Yingjia Liu<sup>1</sup>,  
Jianhan Lin<sup>1,2\*</sup>

<sup>1</sup>Key Laboratory of Agricultural Information Acquisition Technology,  
Ministry of Agriculture and Rural Affairs, China Agricultural University,  
Beijing 100083, China

<sup>2</sup>Key Laboratory of Modern Precision Agriculture System Integration  
Research, Ministry of Education, China Agricultural University, Beijing  
100083, China

<sup>3</sup>State Key Laboratory of Transducer Technology, Shanghai Institute of  
Microsystem and Information Technology, Chinese Academy of Sciences,  
Shanghai, 200050, China.

\*Corresponding author: Dr. Jianhan Lin, Email: [jianhan@cau.edu.cn](mailto:jianhan@cau.edu.cn)

**Table S1.** Nucleotide sequences of RAA primers and prober

| Primer Type    | Nucleotide Sequence                                                            |
|----------------|--------------------------------------------------------------------------------|
| Probe          | CTCTATTGTCACCGTGGTTCAGTTTATCG(FAM-dT)T(THF)T(BHQ1-dT)ACCAAAGGTTTCAG[C3-spacer] |
| Forward primer | ATTGGCGATAGCCTGGCGGTGGGTTTTGTTGT                                               |
| Reverse primer | TACCGGGCATACCATCCAGAGAAAATCGGGCCGC                                             |

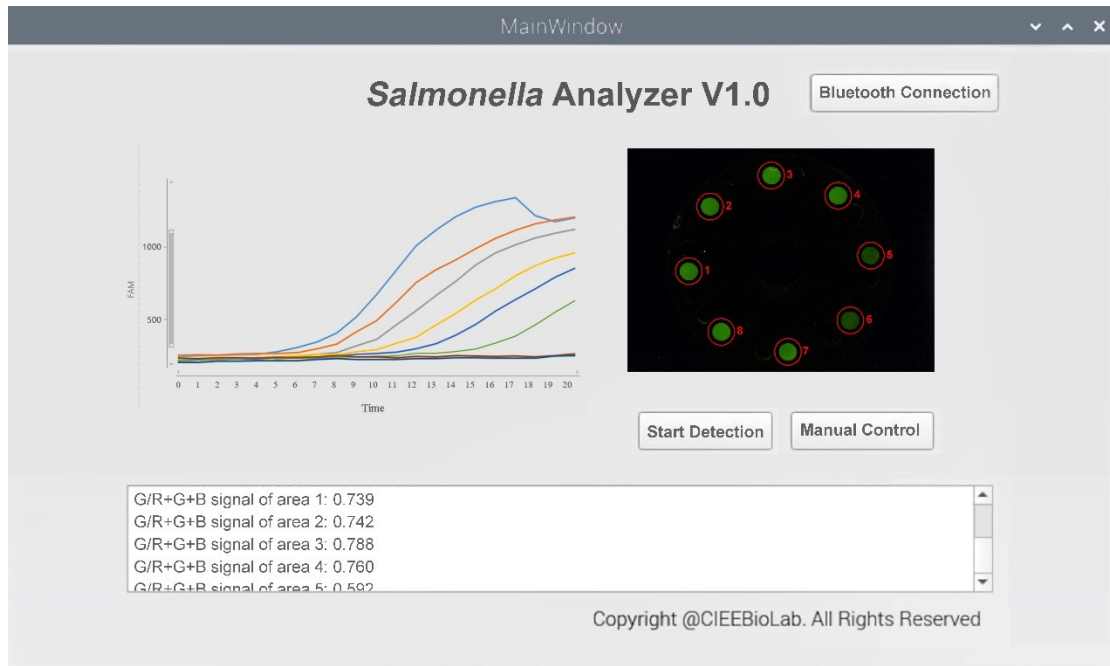

**Fig. S1** The embedded software of the supporting device

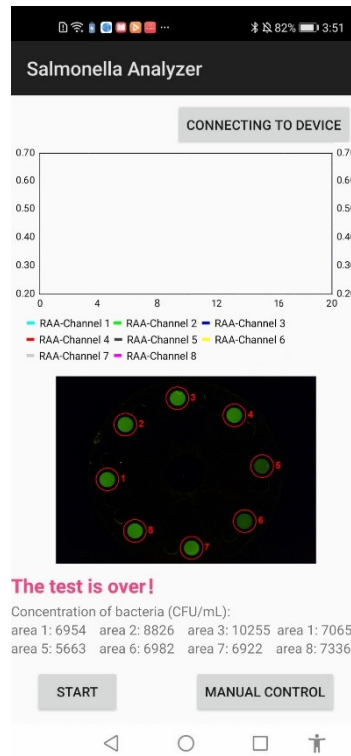

**Fig. S2** The App on the Android smartphone
